# Supplementary material for: Microencapsulation of Dragon Fruit Peel Extract by Freeze-Drying Using Hydrocolloids: Optimization by Hybrid Artificial Neural Network and Genetic Algorithm
Source: Research Square preprint supplement (doi:10.21203/rs.3.rs-1432238/v1), 2022-03-11
Supplement: Supplementary file 1 [file 4fe7b99fffcb19203b06a174.docx]

**Table 1.** Relative effect of process parameters on the properties of freeze-dried encapsulated product

| **Relative effect** |  |  |  |  |
| --- | --- | --- | --- | --- |
| x1 |  |  |  |  |
| x2 |  |  |  |  |
| x3 |  |  |  |  |
| x4 |  |  |  |  |

Where in , ‘i’ denotes the response neuron

**Table 2.** ANN-GA model predicted responses and experimental values at the optimum condition

| **Response** | **Encapsulation efficiency (%)** | **Antioxidant activity (%)** | **Hygroscopicity (g/100g)** | **Solubility (%)** |
| --- | --- | --- | --- | --- |
| **Predicted** | 88.143 | 81.702 | 6.924 | 32.841 |
| **Experimental** | 89.715 | 80.039 | 7.003 | 32.418 |
| **Relative deviation (%)** | 1.752 | 2.077 | 1.129 | 1.305 |

**Table 3.** Thermal stability of freeze-dried encapsulated product at 80°C and two pH levels

| **pH** |  | **, min** |  |  | **RMSE** |
| --- | --- | --- | --- | --- | --- |
| **7** |  |  |  |  |  |
| **3.6** |  |  |  |  |  |
